# Supplementary material for: Essential Medicines in a High Income Country: Essential to Whom?
Source: PubMed Central journal article supplement (PMC4674059; doi:10.1371/journal.pone.0143654), 2015-12-09
Supplement: pone.0143654.s003.pdf [file pone.0143654.s003.pdf]

## Consolidated criteria for reporting qualitative studies (COREQ): 32-item checklist

Developed from:

Tong A, Sainsbury P, Craig J. Consolidated criteria for reporting qualitative research (COREQ): a 32-item checklist for interviews and focus groups. *International Journal for Quality in Health Care*. 2007. Volume 19, Number 6: pp. 349 – 357

| No. Item                                       | Guide questions/description                            | Reported on Page #                                                                                                                                                                                                                                                             |
|------------------------------------------------|--------------------------------------------------------|--------------------------------------------------------------------------------------------------------------------------------------------------------------------------------------------------------------------------------------------------------------------------------|
| <b>Domain 1: Research team and reflexivity</b> |                                                        |                                                                                                                                                                                                                                                                                |
| <i>Personal Characteristics</i>                |                                                        |                                                                                                                                                                                                                                                                                |
| 1. Interviewer/facilitator                     | Which author/s conducted the interview or focus group? | Mai Duong                                                                                                                                                                                                                                                                      |
| 2. Credentials                                 | What were the researcher's credentials? E.g. PhD, MD   | Mai Duong,<br>BSc.Pharm,BHSc(Hons),<br>RPh, M.Phil Candidate<br><br>Rebekah J. Moles,<br>PhD,DipHPharm,BPharm,<br>Senior Lecturer<br><br>Betty Chaar,<br>PhD,MHL,BPharm,<br>Senior Lecturer<br><br>Timothy F. Chen,<br>PhD,DipHPharm,Pharm,<br>MPS,MSHP,Associate<br>Professor |
| 3. Occupation                                  | What was their occupation at the time of the study?    | Pharmacist, M.Phil student, Teaching Assistant                                                                                                                                                                                                                                 |
| 4. Gender                                      | Was the researcher male or female?                     | Female                                                                                                                                                                                                                                                                         |
| 5. Experience and training                     | What experience or training did the researcher have?   | Methods -<br>The researcher gathered data from hospital interviews in Costa Rica in a study at the University of Toronto in 2006. She participated in ACSPRI qualitative research methods training courses in Australia in 2013.                                               |
| <i>Relationship with participants</i>          |                                                        |                                                                                                                                                                                                                                                                                |

|                                             |                                                                                                                                                          |                                                |
|---------------------------------------------|----------------------------------------------------------------------------------------------------------------------------------------------------------|------------------------------------------------|
| 6. Relationship established                 | Was a relationship established prior to study commencement?                                                                                              | No                                             |
| 7. Participant knowledge of the interviewer | What did the participants know about the researcher? e.g. personal goals, reasons for doing the research                                                 | Participant information sheet and Consent Form |
| 8. Interviewer characteristics              | What characteristics were reported about the interviewer/facilitator? e.g. Bias, assumptions, reasons and interests in the research topic                | Methods                                        |
| <b>Domain 2: study design</b>               |                                                                                                                                                          |                                                |
| <i>Theoretical framework</i>                |                                                                                                                                                          |                                                |
| 9. Methodological orientation and Theory    | What methodological orientation was stated to underpin the study? e.g. grounded theory, discourse analysis, ethnography, phenomenology, content analysis | Methods                                        |
| <i>Participant selection</i>                |                                                                                                                                                          |                                                |
| 10. Sampling                                | How were participants selected? e.g. purposive, convenience, consecutive, snowball                                                                       | Methods                                        |
| 11. Method of approach                      | How were participants approached? e.g. face-to-face, telephone, mail, email                                                                              | Methods                                        |
| 12. Sample size                             | How many participants were in the study?                                                                                                                 | Methods                                        |
| 13. Non-participation                       | How many people refused to participate or dropped out? Reasons?                                                                                          | Methods                                        |
| <i>Setting</i>                              |                                                                                                                                                          |                                                |
| 14. Setting of data collection              | Where was the data collected? e.g. home, clinic, workplace                                                                                               | Methods                                        |
| 15. Presence of non-participants            | Was anyone else present besides the participants and researchers?                                                                                        | No                                             |
| 16. Description of sample                   | What are the important characteristics of the sample? e.g. demographic data, date                                                                        | Methods                                        |
| <i>Data collection</i>                      |                                                                                                                                                          |                                                |
| 17. Interview guide                         | Were questions, prompts, guides provided by the authors? Was it pilot tested?                                                                            | Methods                                        |
| 18. Repeat interviews                       | Were repeat inter views carried out? If yes, how many?                                                                                                   | No                                             |
| 19. Audio/visual recording                  | Did the research use audio or visual recording to collect the data?                                                                                      | Methods                                        |
| 20. Field notes                             | Were field notes made during and/or after the inter view or focus group?                                                                                 | Methods                                        |
| 21. Duration                                | What was the duration of the inter views or focus group?                                                                                                 | Methods                                        |
| 22. Data saturation                         | Was data saturation discussed?                                                                                                                           | Methods                                        |
| 23. Transcripts returned                    | Were transcripts returned to participants for comment and/or                                                                                             | Methods                                        |

|                                        |                                                                                                                                 |            |
|----------------------------------------|---------------------------------------------------------------------------------------------------------------------------------|------------|
|                                        | correction?                                                                                                                     |            |
| <b>Domain 3: analysis and findings</b> |                                                                                                                                 |            |
| <i>Data analysis</i>                   |                                                                                                                                 |            |
| 24. Number of data coders              | How many data coders coded the data?                                                                                            | Methods    |
| 25. Description of the coding tree     | Did authors provide a description of the coding tree?                                                                           | Methods    |
| 26. Derivation of themes               | Were themes identified in advance or derived from the data?                                                                     | Methods    |
| 27. Software                           | What software, if applicable, was used to manage the data?                                                                      | Methods    |
| 28. Participant checking               | Did participants provide feedback on the findings?                                                                              | Methods    |
| <i>Reporting</i>                       |                                                                                                                                 |            |
| 29. Quotations presented               | Were participant quotations presented to illustrate the themes/findings? Was each quotation identified? e.g. participant number | Results    |
| 30. Data and findings consistent       | Was there consistency between the data presented and the findings?                                                              | Discussion |
| 31. Clarity of major themes            | Were major themes clearly presented in the findings?                                                                            | Results    |
| 32. Clarity of minor themes            | Is there a description of diverse cases or discussion of minor themes?                                                          | Results    |
